# Supplementary material
Source: PubMed Central journal article supplement (PMC10241268)
Supplement: EIJ-D-21-00846_Leurent_SD.pdf [file EIJ-D-21-00846_Leurent_SD.pdf]

## Supplementary data

**Supplementary Table 1. Main echographic data of the landmark population at 12 months in the MITRA-FR trial.**

| <b>Characteristics</b>                | <b>TMVR group</b>    | <b>GDMT group</b>    |
|---------------------------------------|----------------------|----------------------|
| <i>Echographic data</i>               |                      |                      |
| Left ventricular ejection fraction, % | 33.4±10.7<br>(n=52)  | 37.3±11.2 (n=54)     |
| Indexed LVEDV, ml/m <sup>2</sup>      | 127.8±33.3<br>(n=52) | 138.4±33.5<br>(n=54) |
| Indexed LVESV, ml/m <sup>2</sup>      | 831.0±34.4<br>(n=52) | 89.3±33.0 (n=54)     |
| EROA, mm <sup>2</sup>                 | 11.5±9.6<br>(n=33)   | 24.5±14.5 (n=49)     |
| Regurgitant volume, ml                | 18.1±14.0<br>(n=34)  | 39.6±19.5 (n=50)     |
| PASP, mmHg                            | 34.7±12.5<br>(n=40)  | 36.5±12.3 (n=43)     |

EROA: effective regurgitant orifice area; GDMT: guideline-directed medical treatment; LVEDV: left ventricular end-diastolic volume; LVESV: left ventricular end-systolic volume; PASP: pulmonary arterial systolic pressure; TVMR: transcatheter mitral valve repair

**Supplementary Table 2. Main characteristics of the landmark population at inclusion in the MITRA-FR trial.**

| <b>Characteristics</b>                                       | <b>TMVR<br/>group<br/>(n=113)</b> | <b>GDMT<br/>group<br/>(n=113)</b> | <b>p-<br/>value</b> |
|--------------------------------------------------------------|-----------------------------------|-----------------------------------|---------------------|
| <i>Clinical data</i>                                         |                                   |                                   |                     |
| Age, years                                                   | 69.1±10.4                         | 69.5±9.9                          | 0.83                |
| Age >75 yrs, n (%)                                           | 32 (28.3)                         | 37 (32.7)                         | 0.56                |
| Female sex, n (%)                                            | 22 (19.5)                         | 32 (28.3)                         | 0.16                |
| Body mass index, kg/m <sup>2</sup>                           | 25.3±4.5                          | 25.4±3.9                          | 0.80                |
| Systolic blood pressure, mmHg                                | 108.8±16.3                        | 108.4±18.7                        | 0.67                |
| Heart rate, beats/min                                        | 72.6±13.1                         | 71.6±12.9                         | 0.37                |
| <i>Medical history</i>                                       |                                   |                                   |                     |
| Ischaemic cardiomyopathy, n (%)                              | 70 (61.9)                         | 64 (56.6)                         | 0.49                |
| Non-ischaemic cardiomyopathy, n (%)                          | 42 (37.2)                         | 46 (40.7)                         | 0.68                |
| Previous myocardial infarction, n (%)                        | 59 (52.2)                         | 40 (35.4)                         | 0.015               |
| Previous coronary revascularisation, n (%)                   | 53 (46.9)                         | 48 (42.5)                         | 0.59                |
| Prior stroke, n (%)                                          | 12 (10.6)                         | 7 (6.2)                           | 0.33                |
| Peripheral vascular disease, n (%)                           | 14 (12.4)                         | 10 (8.8)                          | 0.51                |
| History of atrial fibrillation, n (%)                        | 62 (54.9)                         | 63 (55.8)                         | 1.00                |
| Renal insufficiency, n (%)                                   | 13 (11.5)                         | 10 (8.8)                          | 0.66                |
| Glomerular filtration rate, ml/min                           | 50.5±20.1                         | 51.4±20.3                         | 0.75                |
| Diabetes mellitus, n (%)                                     | 41 (36.3)                         | 31 (27.4)                         | 0.19                |
| <i>Functional status/impact</i>                              |                                   |                                   |                     |
| NYHA Class III or IV                                         | 67 (59.2)                         | 77 (68.1)                         | 0.38                |
| Unplanned hospitalisation for heart failure within 12 months | 103 (91.2)                        | 105 (93.8)                        | 0.61                |
| Median BNP* (IQR) ng/litre                                   | 721 (391-1,105)                   | 729 (490-1,118)                   | 0.68                |

|                                                        |                            |                         |      |
|--------------------------------------------------------|----------------------------|-------------------------|------|
| Median NT-proBNP* (IQR), ng/litre                      | 2,884<br>(1,790-<br>4,317) | 2,722 (1,703-<br>5,118) | 0.91 |
| <i>Echographic data</i>                                |                            |                         |      |
| Left ventricular ejection fraction, %                  | 33.9±5.9                   | 33.0±6.7                | 0.38 |
| Indexed LVEDV, ml/m <sup>2</sup>                       | 132.9±34.4                 | 138.6±32.1              | 0.19 |
| Indexed LVESV, ml/m <sup>2</sup>                       | 88.3±29.3                  | 93.8±29.1               | 0.09 |
| EROA, mm <sup>2</sup>                                  | 30.3±10.4                  | 29.8±10.4               | 0.73 |
| Regurgitant volume, ml                                 | 44.2±13.6                  | 44.5±13.7               | 0.93 |
| EROA/LVEDV, mm <sup>2</sup> /100 ml of LVEDV           | 0.13±0.05                  | 0.12±0.05               | 0.14 |
| PASP, mmHg                                             | 44.1±14.4                  | 44.7±12.9               | 0.52 |
| Tricuspid regurgitation >moderate, n (%)               | 21 (20.0)                  | 15 (14.1)               | 0.60 |
| <i>Risk scores</i>                                     |                            |                         |      |
| Median logistic EuroSCORE II (IQR)                     | 5.6 (3.2-<br>11.0)         | 5.4 (3.1-9.2)           | 0.55 |
| Median STS score for mortality (IQR)                   | 3.1 (1.5-5.8)              | 2.6 (1.3-5.7)           | 0.44 |
| <i>Medical treatment</i>                               |                            |                         |      |
| Single implantable cardioverter-defibrillator, n (%)   | 61 (54.0)                  | 60 (53.1)               | 1.00 |
| Cardiac resynchronisation therapy-defibrillator, n (%) | 64 (56.6)                  | 67 (59.3)               | 0.78 |
| Single cardiac resynchronisation therapy device, n (%) | 29 (25.7)                  | 25 (22.1)               | 0.64 |
| ACEi/ARB, n (%)                                        | 82 (72.6)                  | 83 (73.5)               | 1.00 |
| Angiotensin receptor and neprilysin inhibitors, n (%)  | 11 (10.5)                  | 15 (14.2)               | 0.53 |
| Beta-blockers, n (%)                                   | 98 (86.7)                  | 102 (90.3)              | 0.53 |
| Mineralocorticoid receptor antagonists, n (%)          | 71 (62.8)                  | 62 (55.4)               | 0.27 |
| Loop diuretics, n (%)                                  | 112 (99.1)                 | 110 (97.3)              | 0.62 |

---

|                            |           |           |      |
|----------------------------|-----------|-----------|------|
| Oral anticoagulants, n (%) | 65 (57.5) | 69 (61.1) | 0.68 |
|----------------------------|-----------|-----------|------|

---

Landmark analysis in the selected subgroup of MITRA-FR patients still alive at 12 months (whether they were hospitalised or not for heart failure within the first year).

Plus–minus values are means±SD.

\*Brain natriuretic peptide (BNP) was measured in 51 of the 113 patients in the MitraClip group and in 45 of the 113 patients in the control group, and NT-proBNP in 56 and 53 patients, respectively. All the measurements were obtained locally.

ACEi: angiotensin-converting enzyme inhibitor. ARB: angiotensin receptor blocker; EROA: effective regurgitant orifice area; GDMT: guideline-directed medical treatment; IQR: interquartile range; LVEDV: left ventricular end-diastolic volume; LVESV: left ventricular end-systolic volume; NYHA: New York Heart Association; PASP: pulmonary arterial systolic pressure; STS: Society of Thoracic Surgeons; TVMR: transcatheter mitral valve repair

**Supplementary Table 3. Main characteristics of the landmark analysis-included and non-included populations, from the MITRA-FR trial overall population.**

| <b>Characteristics</b>                     | <b>Landmark population<br/>(n=226)</b> | <b>Non-included population<br/>(n=78)</b> | <b>p-value</b> |
|--------------------------------------------|----------------------------------------|-------------------------------------------|----------------|
| <i>Clinical data</i>                       |                                        |                                           |                |
| Age, years                                 | 69.3±10.1                              | 73.1±8.8                                  | 0.002          |
| Age >75 yrs, n (%)                         | 69 (30.5)                              | 41 (52.6)                                 | 0.006          |
| Female sex, n (%)                          | 54 (23.9)                              | 23 (29.5)                                 | 0.36           |
| Body mass index, kg/m <sup>2</sup>         | 25.4±4.2                               | 24.5±3.4                                  | 0.14           |
| Systolic blood pressure, mmHg              | 108.6±17.5                             | 108.1±15.0                                | 0.77           |
| Heart rate, beats/min                      | 72.1±13.0                              | 73.5±11.4                                 | 0.17           |
| <i>Medical history</i>                     |                                        |                                           |                |
| Ischaemic cardiomyopathy, n (%)            | 134 (59.3)                             | 92 (40.7)                                 | 1.00           |
| Non-ischaemic cardiomyopathy, n (%)        | 88 (38.9)                              | 31 (40.3)                                 | 0.89           |
| Previous myocardial infarction, n (%)      | 99 (43.8)                              | 28 (35.9)                                 | 0.23           |
| Previous coronary revascularisation, n (%) | 101 (44.7)                             | 34 (44.2)                                 | 1.00           |
| Prior stroke, n (%)                        | 19 (8.4)                               | 9 (11.5)                                  | 0.49           |
| Peripheral vascular disease, n (%)         | 24 (10.6)                              | 8 (11.3)                                  | 1.00           |
| History of atrial fibrillation, n (%)      | 70 (32.7)                              | 27 (36.0)                                 | 0.67           |
| Renal insufficiency, n (%)                 | 23 (10.2)                              | 18 (23.1)                                 | 0.006          |
| Glomerular filtration rate, ml/min         | 50.9±20.1                              | 44.9±18.3                                 | 0.02           |
| Diabetes mellitus, n (%)                   | 72 (31.9)                              | 17 (21.8)                                 | 0.11           |
| <i>Functional status/impact</i>            |                                        |                                           |                |
| NYHA Class III or IV                       | 144 (63.7)                             | 60 (76.9)                                 | 0.02           |

|                                                                  |                     |                      |         |
|------------------------------------------------------------------|---------------------|----------------------|---------|
| Unplanned hospitalisation for heart failure within the 12 months | 208 (92.4)          | 75 (96.2)            | 0.30    |
| Median BNP* (IQR), ng/litre                                      | 723 (414-1,111)     | 1,064 (881-2,950)    | 0.0001  |
| Median NT-proBNP* (IQR), ng/litre                                | 2,750 (1,757-5,058) | 5,932 (3,231-13,248) | <0.0001 |
| <i>Echographic data</i>                                          |                     |                      |         |
| Left ventricular ejection fraction, %                            | 33.5±6.3            | 31.9±7.1             | 0.05    |
| Indexed LVEDV, ml/m <sup>2</sup>                                 | 135.7±33.3          | 134.2±40.5           | 0.64    |
| Indexed LVESV, ml/m <sup>2</sup>                                 | 91.1±29.3           | 92.5±33.1            | 0.87    |
| EROA, mm <sup>2</sup>                                            | 30.1±10.4           | 33.3±11.3            | 0.01    |
| Regurgitant volume, ml                                           | 44.4±13.6           | 47.6±13.2            | 0.03    |
| EROA/LVEDV, mm <sup>2</sup> /100 ml of LVEDV                     | 0.13±0.05           | 0.15±0.06            | 0.002   |
| PASP, mmHg                                                       | 44.4±13.6           | 46.5±13.0            | 0.73    |
| Tricuspid regurgitation >moderate, n (%)                         | 36 (17.1)           | 16 (22.5)            | 0.03    |
| <i>Risk scores</i>                                               |                     |                      |         |
| Median logistic EuroSCORE II (IQR)                               | 5.61 (3.2-9.9)      | 8.20 (4.5-15.3)      | 0.001   |
| Median STS score for mortality (IQR)                             | 2.99 (1.4-5.8)      | 4.68 (2.2-8.8)       | 0.002   |
| <i>Medical treatment</i>                                         |                     |                      |         |
| Single implantable cardioverter-defibrillator, n (%)             | 121 (53.5)          | 51 (65.4)            | 0.08    |
| Cardiac resynchronisation therapy-defibrillator, n (%)           | 131 (58.0)          | 55 (70.5)            | 0.05    |
| Single cardiac resynchronisation therapy device, n (%)           | 54 (23.9)           | 27 (35.1)            | 0.07    |
| ACEi/ARB, n (%)                                                  | 165 (73.0)          | 59 (75.6)            | 0.76    |

|                                                       |            |           |      |
|-------------------------------------------------------|------------|-----------|------|
| Angiotensin receptor and neprilysin inhibitors, n (%) | 26 (12.3)  | 5 (7.2)   | 0.27 |
| Beta-blockers, n (%)                                  | 200 (88.5) | 72 (92.3) | 0.39 |
| Mineralocorticoid receptor antagonists, n (%)         | 133 (59.1) | 33 (42.3) | 0.01 |
| Loop diuretics, n (%)                                 | 222 (98.2) | 78 (100)  | 0.57 |
| Oral anticoagulants, n (%)                            | 134 (59.3) | 52 (66.7) | 0.28 |

Landmark analysis in the selected subgroup of MITRA-FR patients still alive at 12 months (whether they were hospitalised or not for heart failure within the first year).

Plus–minus values are means±SD.

\*BNP was measured in 96 of the 226 patients in the Landmark-studied group and in 30 of the 78 patients in the not-included group, and NT-proBNP in 109 and 38 patients, respectively.

ACEi: angiotensin-converting enzyme inhibitor. ARB: angiotensin receptor blocker; EROA: effective regurgitant orifice area; GDMT: guideline-directed medical treatment; IQR: interquartile range; LVEDV: left ventricular end-diastolic volume; LVESV: left ventricular end-systolic volume; NYHA: New York Heart Association; PASP: pulmonary arterial systolic pressure; STS: Society of Thoracic Surgeons; TVMR: transcatheter mitral valve repair

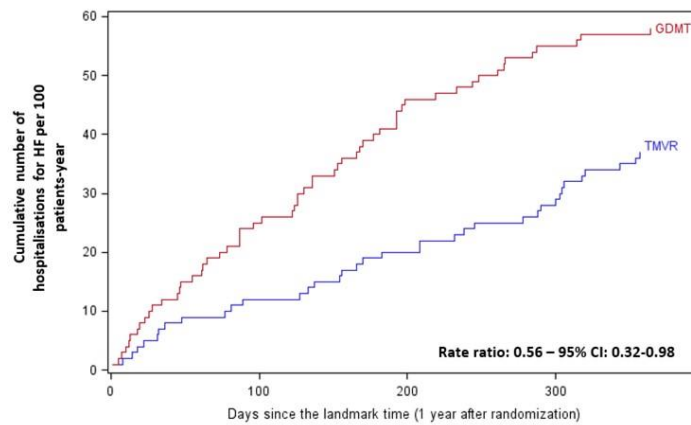

**Supplementary Figure 1.** Cumulative number of hospitalisations for HF per 100 patient-years. Cumulative rates of recurrent hospitalisations for heart failure in the guideline-directed medical treatment (GDMT) and in the transcatheter mitral valve repair (TMVR) groups between 12 and 24 months after inclusion in the MITRA-FR trial. Landmark analysis in the selected subgroup of MITRA-FR patients still alive at 12 months (whether they were hospitalised or not for heart failure within the first year).

CI: confidence interval



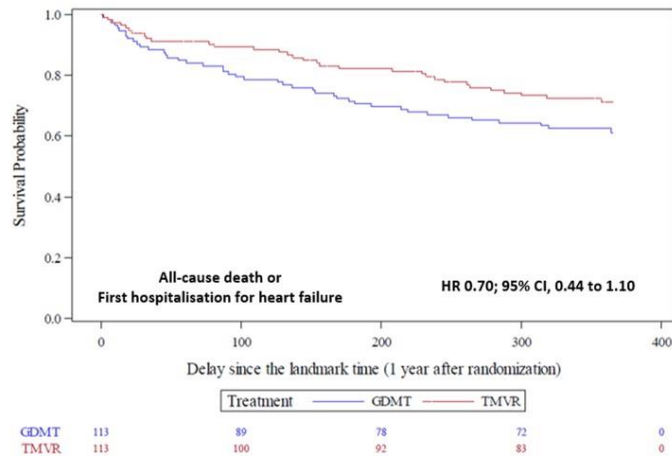

**Supplementary Figure 2.** Kaplan-Meier estimates for all-cause death or unplanned heart failure hospitalisation in the guideline-directed medical treatment (GDMT) and in the transcatheter mitral valve repair (TMVR) groups between 12 and 24 months after inclusion in the MITRA-FR trial. Landmark analysis in the selected subgroup of MITRA-FR patients still alive at 12 months (whether they were hospitalised or not for heart failure within the first year). CI: confidence interval; HR: hazard ratio

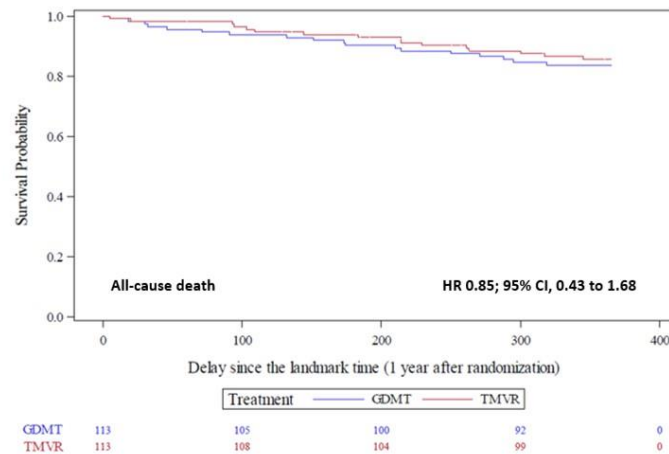

**Supplementary Figure 3.** Kaplan-Meier estimates for all-cause death in the guideline-directed medical treatment (GDMT) and in the transcatheter mitral valve repair (TMVR) groups between 12 and 24 months after inclusion in the MITRA-FR trial. Landmark analysis in the selected subgroup of MITRA-FR patients still alive at 12 months (whether they were hospitalised or not for heart failure within the first year). CI: confidence interval; HR: hazard ratio

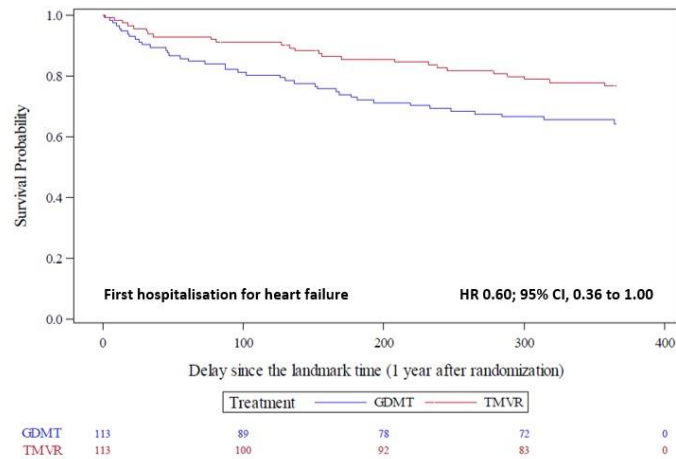

**Supplementary Figure 4.** Kaplan-Meier estimates for unplanned heart failure hospitalisation in the guideline-directed medical treatment (GDMT) and in the transcatheter mitral valve repair (TMVR) groups between 12 and 24 months after inclusion in the MITRA-FR trial. Landmark analysis in the selected subgroup of MITRA-FR patients still alive at 12 months (whether they were hospitalised or not for heart failure within the first year). CI: confidence interval; HR: hazard ratio
